## Correction: Cdc6 contributes to cisplatin-resistance by activation of ATR-Chk1 pathway in bladder cancer cells

Sansan Chen<sup>1,2,\*</sup>, Xinglu Chen<sup>2,\*</sup>, Gui'e Xie<sup>3,\*</sup>, Yue He<sup>2</sup>, Daoyu Yan<sup>2</sup>, Dianpeng Zheng<sup>2</sup>, Shi Li<sup>1</sup>, Xinyang Fu<sup>1</sup>, Yeping Li<sup>1</sup>, Xiang Pang<sup>1</sup>, Zhiming Hu<sup>2</sup>, Hongwei Li<sup>2</sup>, Wanlong Tan<sup>1</sup> and Jinlong Li<sup>2</sup>

<sup>1</sup>Department of Urology, Nanfang Hospital, Southern Medical University, Guangzhou, Guangdong, China

<sup>2</sup>Institute of Biotherapy, School of Biotechnology, Southern Medical University, Guangzhou, Guangdong, China

<sup>3</sup>KingMed School of Laboratory Medicine, Guangzhou Medical University, Guangzhou, Guangdong, China

\*These authors contributed equally to this work

### Published:

**Copyright:** © 2021 Chen et al. This is an open access article distributed under the terms of the [Creative Commons Attribution License](#) (CC BY 3.0), which permits unrestricted use, distribution, and reproduction in any medium, provided the original author and source are credited.

**This article has been corrected:** Due to errors during Figure preparation, the wrong image was selected for placement in Figure 3D (UMUC3 cells, Si-NC panel). This image contained a partial duplicate of an image in Figure 3C (UMUC3 cells, Si-Cdc6 column). The corrected Figure 3 is shown below. In addition, the legend of Figure 3 contains a spelling error - the word 'invision' has been changed to 'invasion'. The authors declare that these corrections do not change the results or conclusions of this paper.

Original article: Oncotarget. 2016; 7:40362–40376. <https://doi.org/10.18632/oncotarget.9616>

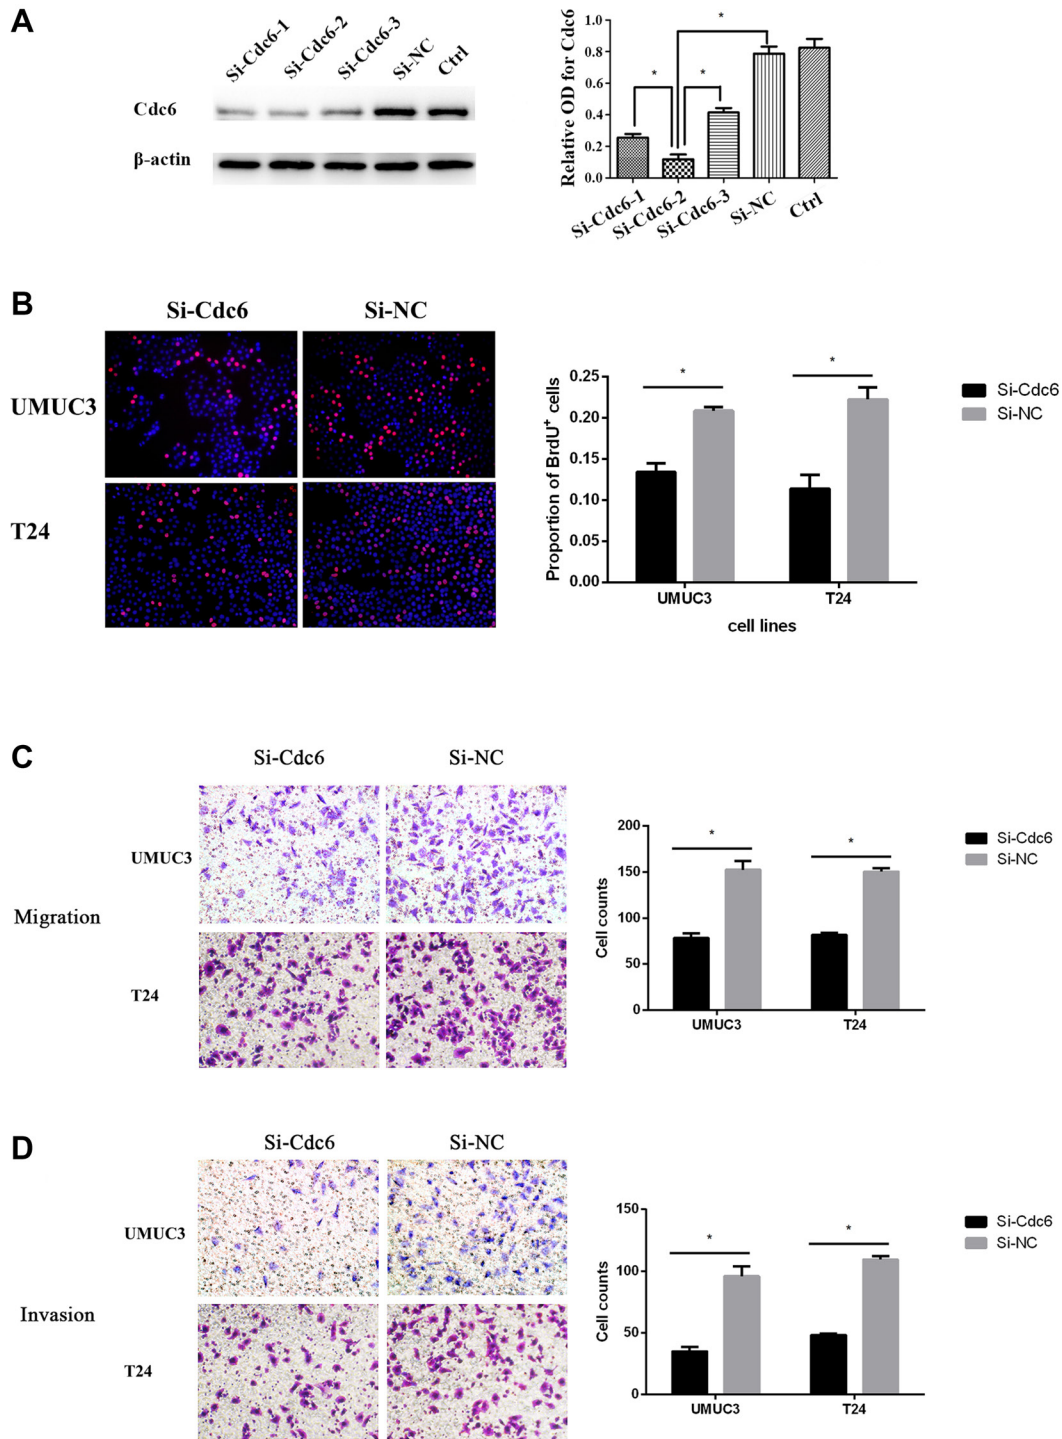

**Figure 3: Cdc6 depletion reduced DNA replication, migration and invasion in bladder cancer cells.** (A) UMUC3 Cells were transfected with Cdc6 siRNA-1, 2, 3 or negative control siRNA (Si-NC) for 48 h. Cdc6 protein level was analyzed by Western blot. Beta-actin was used as the loading control. Data are expressed as optical density (OD) fold difference related to beta-actin from 3 duplicate experiments, \* $P < 0.05$ . (B) UMUC3 or T24 Cells were transfected with Cdc6 siRNA-2 or Si-NC for 48 h, BrdU incorporation assays were performed to evaluate DNA synthesis after transfection for 48 h; Transwell migration assay (C) and transwell invasion assay (D) UMUC3 or T24 Cells were transfected with Cdc6 siRNA-2 or Si-NC for 24 h, cells were plated on the upper chambers. After 24 h, cells of migration and invasion were counted. Data are shown as mean  $\pm$  SD of three independent experiments (right panel), \* $P < 0.05$ .
